# Supplementary material for: Local IL-10 delivery modulates the immune response and enhances repair of volumetric muscle loss muscle injury
Source: PubMed Central journal article supplement (PMC9898301; doi:10.1038/s41598-023-27981-x), 2023-02-03
Supplement: 41598_2023_27981_MOESM1_ESM.pdf [file 41598_2023_27981_MOESM1_ESM.pdf]

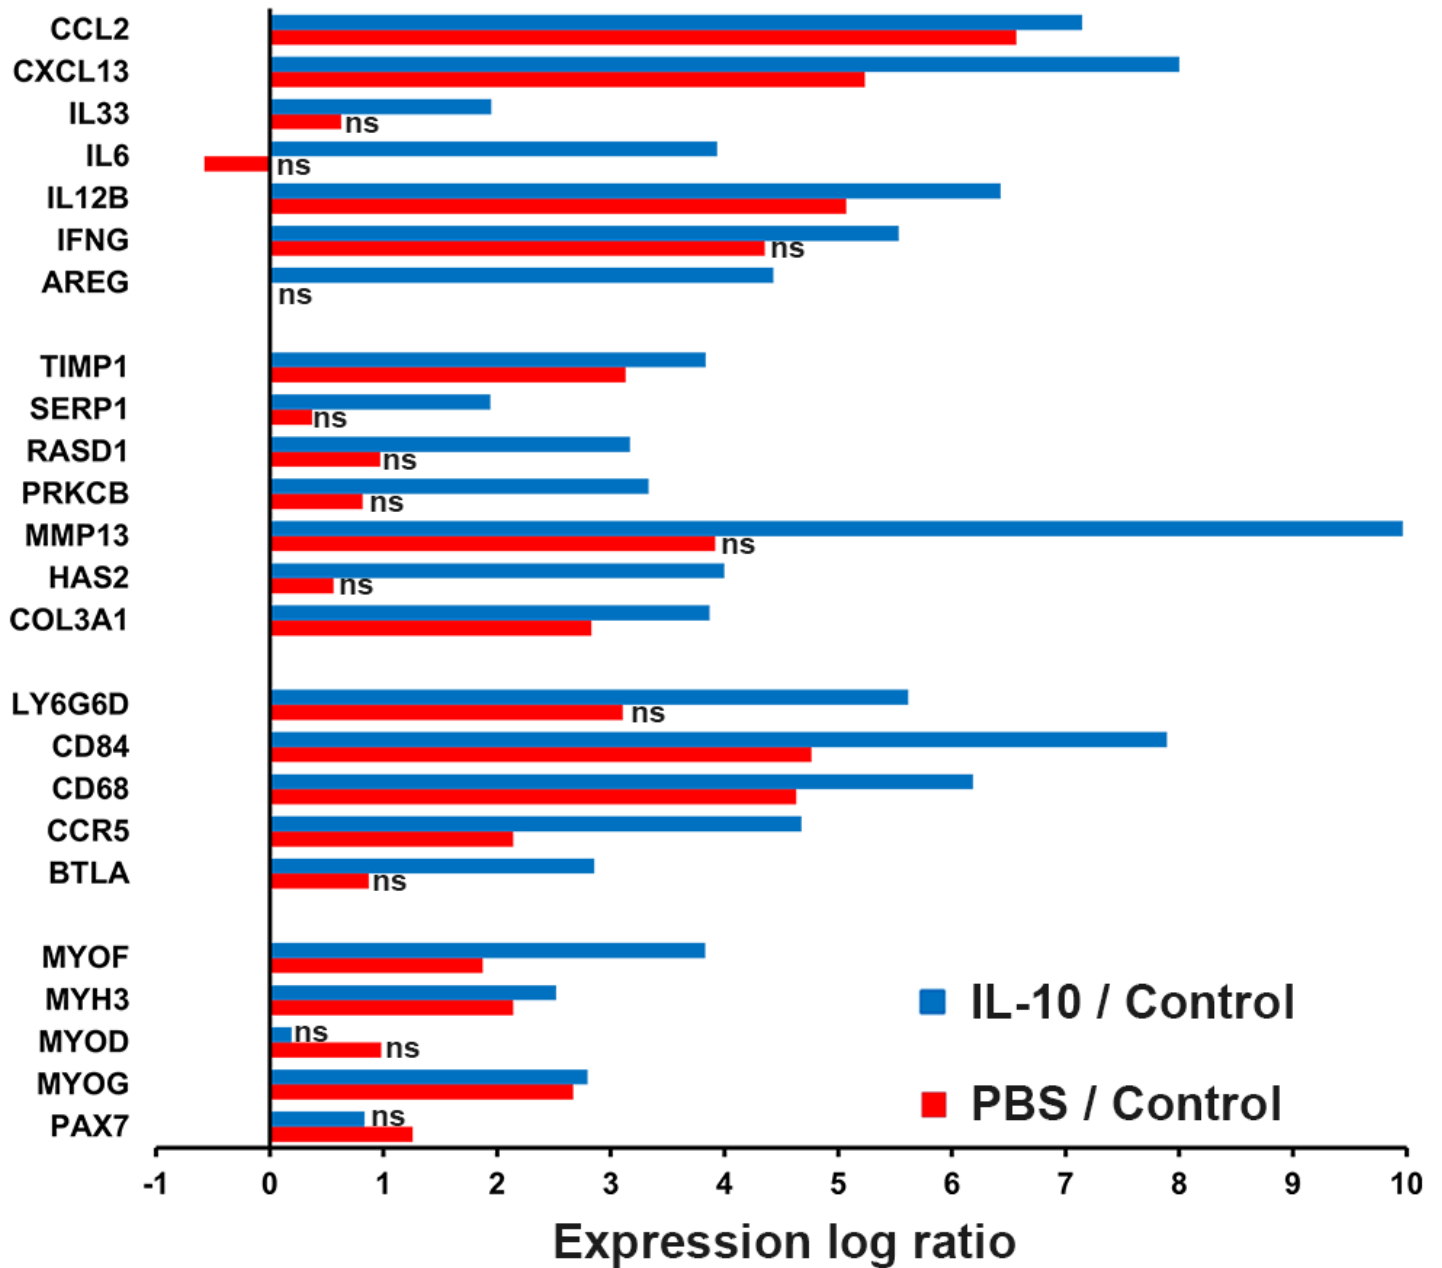

**Supplementary figure 1:** Selected gene expression for key IL-10 treatment and PBS controls genes with respect to uninjured controls are presented as log ratio ( $\log_2FC$ ). “ns” indicates no significant difference (FDR > 0.05).

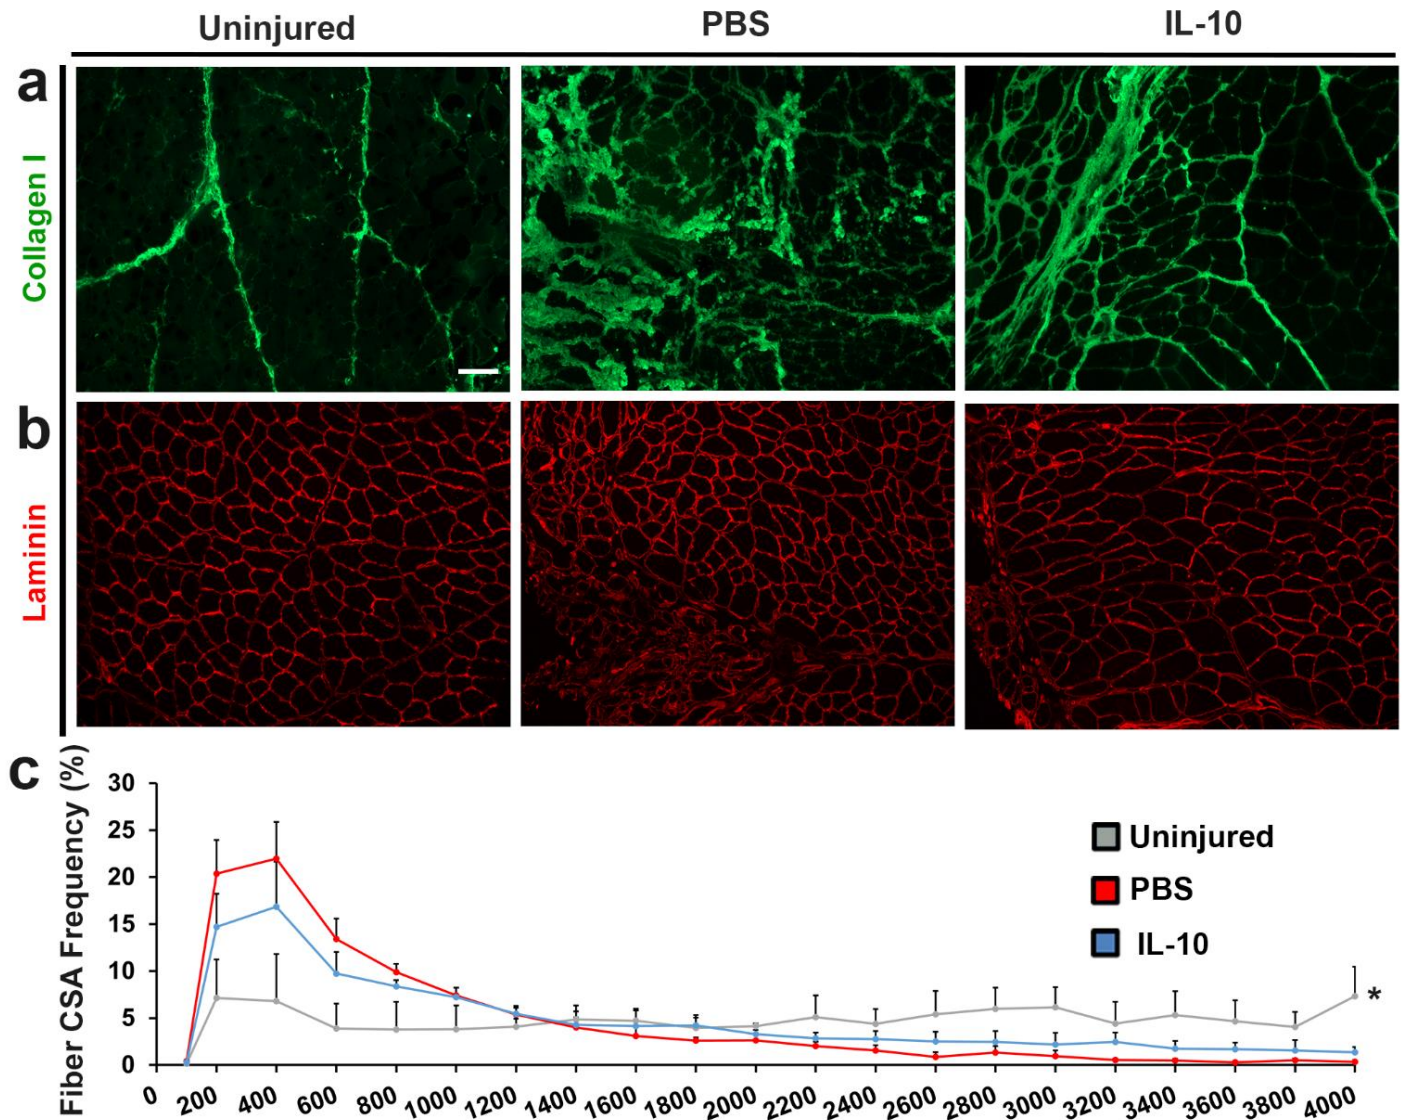

**Supplementary figure 2:** TA muscle cross-sections were stained for (a) collagen I (green), b) Laminin (red). Representative uninjured (left), 56 days post PBS injection (middle), and IL-10 injection (right) TA cross-sections are presented. Scale bar = 100 $\mu\text{m}$ . Laminin cross-sections were used to quantify for (c) muscle fiber cross-sectional area frequency distribution curve. About 600 fibers from and nearby to injury sites were included per animal, with 4 animals per group. PBS and IL-10 curves display a similar range of CSA values but are statistically different from injured control (Chi-squared analysis with  $\alpha < 0.05$ ). Group means + SD are presented;  $n=4/\text{bin}/\text{group}$ . The \* indicates statistically significant difference between uninjured controls and treatment groups.

Figure 4f ST2

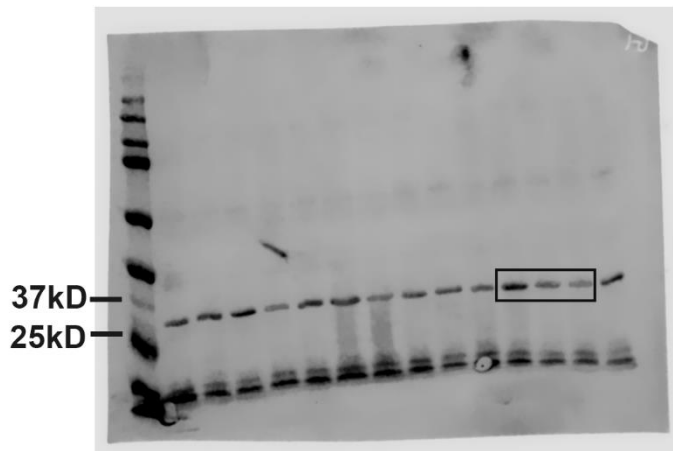

Figure 4f Ponceau

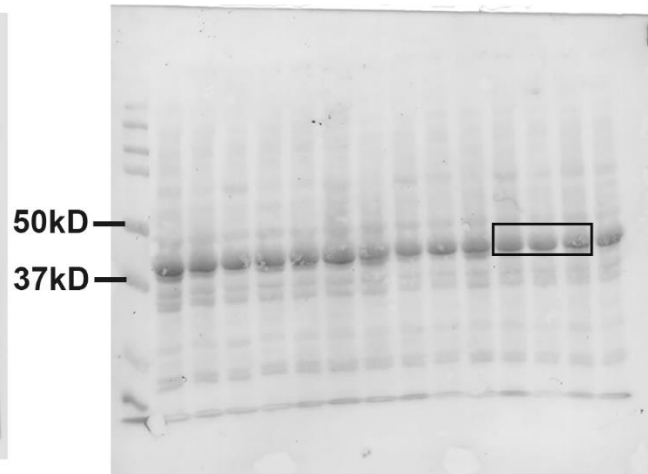

**Supplementary figure 3:** Original images of Western blots in **Fig. 4f**.
